# Supplementary material
Source: Springer Nature journal article supplement (https://www.springermedizin.de/resource/supplementary/12986_2009_205_MOESM9_ESM.pdf/25655588)

EtOAc/glacial acetic acid/formic acid/water (100/1/1/26)

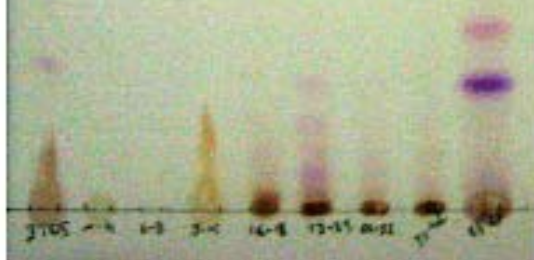

Supplement: MOESM9 [file 25655588]
